# Supplementary material for: Neopentyl glycol as an alternative solvent for the chemical recycling of complex PET waste
Source: Royal Society of Chemistry journal article supplement (doi:10.1039/d4ma00919c), 2024-12-18
Supplement: d4ma00919c1.pdf [file d4ma00919c1.pdf]

### Supplementary Information

#### Neopentyl glycol as alternative solvent for the chemical recycling of complex PET waste

Izotz Amundarain,<sup>\*a</sup> Sheila López-Montenegro,<sup>b</sup> Asier Asueta,<sup>a</sup> Sixto Arnaiz<sup>a</sup> and Beñat Pereda-Ayo<sup>b</sup>

<sup>a</sup> GAIKER Technology Centre, Basque Research and Technology Alliance (BRTA), Parque Tecnológico de Bizkaia, Edificio 202, 48170 Zamudio, Spain.

<sup>b</sup> Department of Chemical Engineering, University of the Basque Country (UPV/EHU), Barrio Sarriena s/n, 48940 Leioa, Spain.

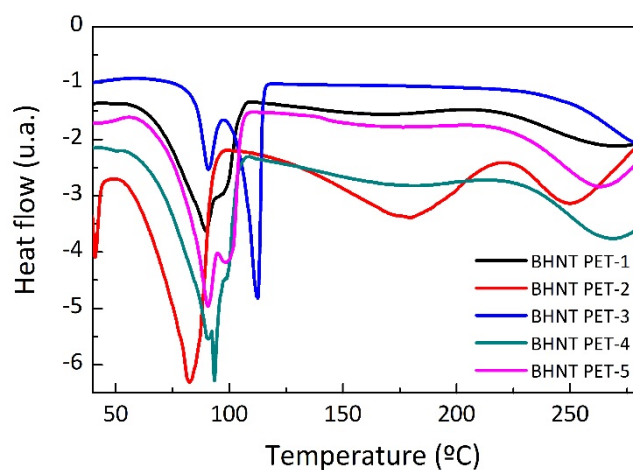

Figure S1. DSC thermogram for reaction products before purification.

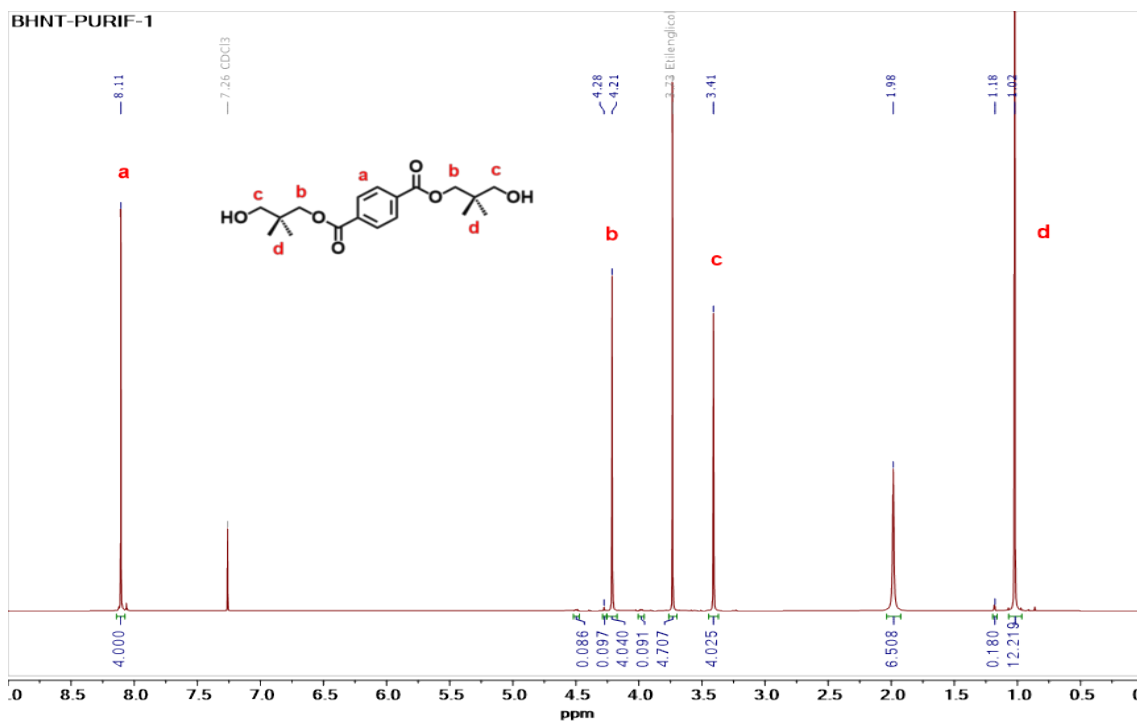

Figure S2. NMR spectra of a purified BHNT sample.

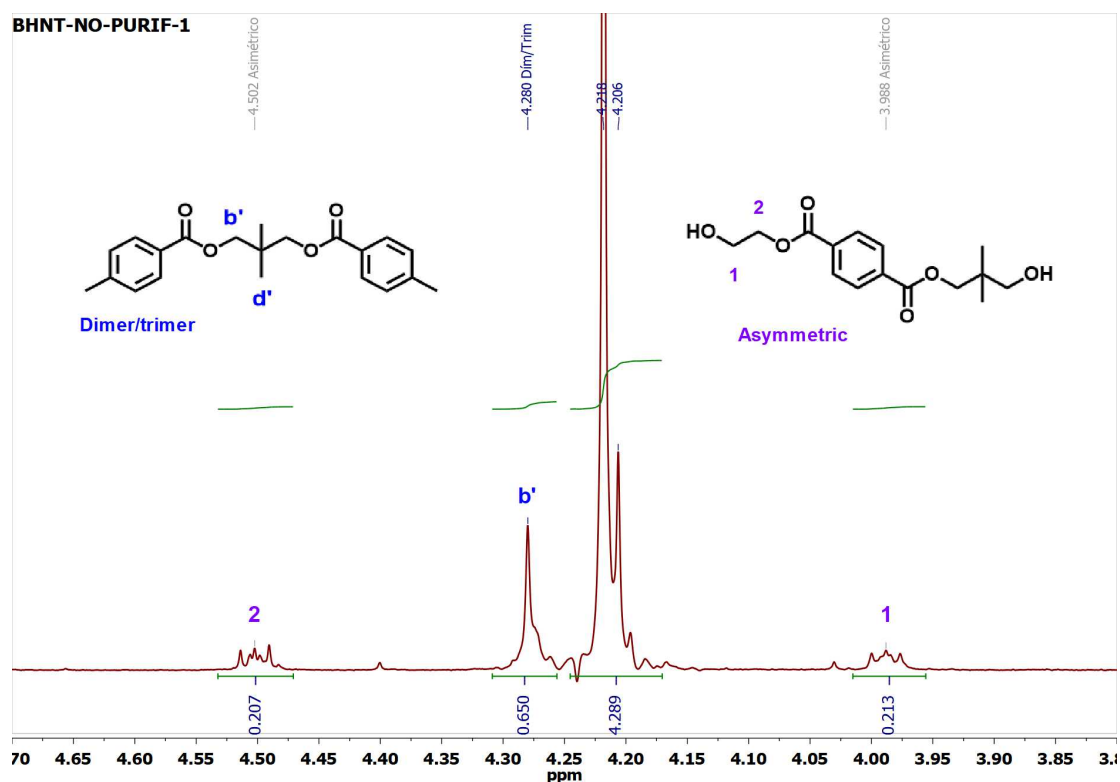

Figure S3. Close-up view of asymmetric and dimer/trimer compound region.

Table S1. BHNT sample composition (raw/purified) according to NMR analysis.

| PET   | BHNT (mol %)  | EG (mol %)  | NPG (mol %)  | Dimer (mol %) | Trimer (mol %) | Asymm. (mol %) |
|-------|---------------|-------------|--------------|---------------|----------------|----------------|
| PET-1 | 63.73 / 94.06 | 0.43 / 0.00 | 18.44 / 0.40 | 9.30 / 3.22   | 0.96 / 0.00    | 7.14 / 2.32    |
| PET-2 | 41.43 / 91.00 | 2.85 / 0.00 | 41.60 / 2.46 | 7.07 / 3.73   | 0.80 / 0.00    | 6.25 / 2.81    |
| PET-3 | 89.46 / 95.32 | 0.22 / 0.00 | 2.42 / 0.16  | 4.84 / 2.47   | 0.00 / 0.00    | 3.06 / 2.05    |
| PET-4 | 75.32 / 90.19 | 0.06 / 0.00 | 6.01 / 1.23  | 9.96 / 5.37   | 1.45 / 0.00    | 7.20 / 3.21    |
| PET-5 | 69.32 / 93.58 | 0.47 / 0.00 | 13.21 / 1.94 | 7.85 / 2.29   | 1.09 / 0.00    | 8.06 / 2.19    |

Table S2. CIELAB colour parameters and Zn content of obtained BHNT samples.

| Sample              | L*    | a*    | b*    | Zn (mg/kg) |
|---------------------|-------|-------|-------|------------|
| BHNT PET-1 raw      | 88.39 | -1.10 | 7.36  | 236.4      |
| BHNT PET-1 purified | 91.41 | -0.05 | 0.63  | 5.2        |
| BHNT PET-2 raw      | 74.19 | -1.31 | 2.39  | 193.6      |
| BHNT PET-2 purified | 93.15 | -0.03 | 0.52  | 4.1        |
| BHNT PET-3 raw      | 69.80 | 5.16  | 17.46 | 347.8      |
| BHNT PET-3 purified | 92.29 | 0.01  | 1.61  | 14.5       |
| BHNT PET-4 raw      | 67.68 | 11.33 | 10.20 | 207.9      |
| BHNT PET-4 purified | 92.46 | 0.11  | 4.52  | 6.1        |
| BHNT PET-5 raw      | 88.14 | -3.57 | 7.63  | 197.3      |
| BHNT PET-5 purified | 92.13 | 0.01  | 0.78  | 2.8        |
